# Supplementary material for: Changes in East Asian summer monsoon precipitation during the Holocene deduced from a freshwater flux reconstruction of the Changjiang (Yangtze River) based on the oxygen isotope mass balance in the northern East China Sea
Source: Copernicus journal article supplement (doi:10.5194/cp-11-265-2015), 2015-02-17
Supplement: Supplementary file 1 [file cp-11-265-2015-supplement.pdf]

Supplement of *Clim. Past*, 11, 265–281, 2015  
<http://www.clim-past.net/11/265/2015/>  
doi:10.5194/cp-11-265-2015-supplement  
© Author(s) 2015. CC Attribution 3.0 License.

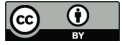

Climate  
of the Past

Open Access

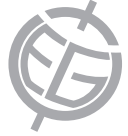

*Supplement of*

## **Changes in East Asian summer monsoon precipitation during the Holocene deduced from a freshwater flux reconstruction of the Changjiang (Yangtze River) based on the oxygen isotope mass balance in the northern East China Sea**

**Y. Kubota et al.**

*Correspondence to:* Y. Kubota (yoshimi@kahaku.go.jp)

## 1) Difference of Mg/Ca values between oxidative and reductive cleaning methods

After Kubota et al. (2010) have been published, foraminiferal samples were re-picked from randomly selected fifteen horizons of KY core and Mg/Ca analyses of these samples are conducted after cleaned by reductive methods. The results indicate that the reductive cleaning methods cause 3-15% decrease in Mg/Ca values. Comparison between reductive and oxidative cleaning method in temperature scale ( $\text{Temperature } [^{\circ}\text{C}] = \ln (\text{Mg/Ca} [\text{mmol/mol}]/0.38) / 0.089$ ) is shown in Fig. S-1. The temperature with oxidative methods show 0.73 °C, on average among fifteen horizons, higher values than those with reductive methods, indicating additional dissolution of Mg with reductive methods.

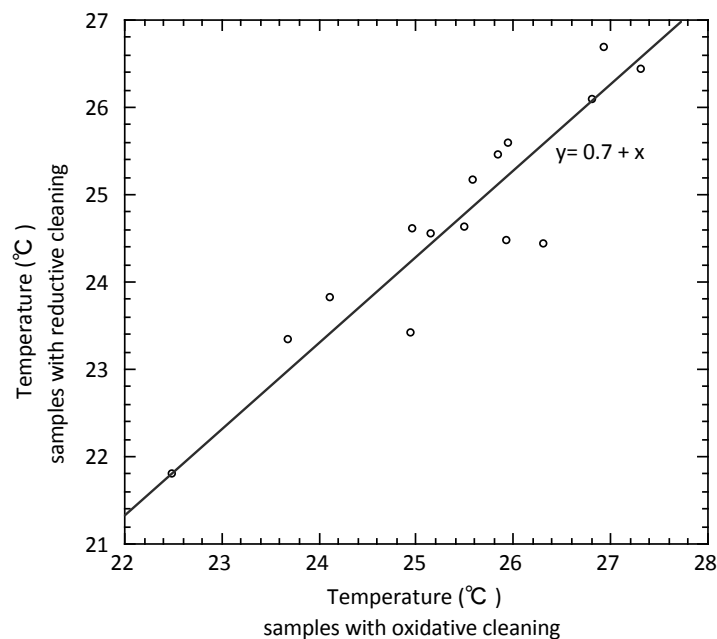

Fig. S-1. Comparison between reductive and oxidative cleaning method in fifteen horizons of KY core.
